# Supplementary material for: Comparing autoregulatory progressive resistance exercise and velocity-based resistance training on jump performance in college badminton athletes
Source: PeerJ. 2023 Aug 7;11:e15877. doi: 10.7717/peerj.15877 (PMC10414022; doi:10.7717/peerj.15877)
Supplement: Supplemental Information 2 [file peerj-11-15877-s002.xlsx]

## Sheet: sheet1
group	age	hight	weighr	CMJPre	CMJPost	SJPre	SJPost	EURPost	EURPost	RSIPre	RSIPost	SSCPre	SSCPost	CMJD	SJD	EURD	RSID	SSCD	filter_$	volume
1	21	183	86.7	41.822	41.536	33.03	35.361	1.271	1.143	0.741	1.122	27.104	14.31	-0.286	2.33	-0.092	0.381	-12.794	0	1957.5
1	20	174	66.2	51.491	48.979	47.289	47.442	1.101	1.039	0.998	1.133	10.073	3.86	-2.512	0.15	-0.056	0.135	-6.213	0	17640
1	24	173	68.2	31.015	32.397	28.253	30.289	1.055	1.032	0.618	0.542	5.504	3.18	1.382	2.04	-0.028	-0.076	-2.324	0	11880
1	21	166	58.3	41.109	42.109	39.841	39.562	1.048	1.091			4.787	9.149	1	-0.28	0.033		4.362	0	11850
1	20	168	57.7	31.895	31.645	28.844	29.442	1.073	1.076	0.564	0.618	7.332	7.635	-0.25	0.6	-0.031	0.054	0.302	0	9097.5
1	20	163	58.1	31.77	32.02	28.964	31.521	1.058	1.005	0.566	0.697	5.836	0.537	0.25	2.56	-0.081	0.131	-5.299	0	15457.5
1	20	163	58.3	33.285	36.556	32.903	31.895	1.003	1.136			0.279	13.558	3.271	-1.01	0.135		13.279	0	15157.5
1	21	181	83.9	43.998	42.976	39.981	36.289	1.079	1.164	1.0385	0.994	7.913	16.351	-1.022	-3.69	0.084	-0.0445	8.438	0	19207.5
1	22	175	60	49.914	50.07	45.778	43.998	1.082	1.109			8.244	10.867	0.156	-1.78	0.048		2.623	0	13815
2	21	173	62.4	51.173	53.254	46.229	51	1.128	1.07	1.4225	1.629	12.759	6.989	2.081	4.77	-0.063	0.2065	-5.77	1	22950
2	23	175	67.8	52.609	56.037	51.809	53.902	1.025	1.041	1.2515	1.139	2.501	4.109	3.428	2.09	0.024	-0.1125	1.608	1	16905
2	21	163	56.3	38.73	40.402	46.156	38.318	1.01	1.035	0.708	0.855	0.97	3.527	1.672	-7.84	0.215	0.147	2.556	1	9847.5
2	24	168		34.575	37.908	32.271	34.057	1.041	1.112			4.147	11.167	3.333	1.79	0.042		7.02	1
2	22	168	66.7			.	.			0.817	0.74						-0.077		1	6652.5
2	24	159	52.9	35.23	38.455	36.691	37.772	0.943	1.067			-5.73	6.742	3.225	1.08	0.058		12.472	1
2	21	165	54.8	34.445	36.423	31.521	32.65	1.05	1.112			4.961	11.243	1.978	1.13	0.023		6.282	1
2	20	184	95.4	44.145	42.541	41.109	36.556	1.083	1.122			8.322	12.178	-1.604	-4.55	0.09		3.856	1	19590
2	21	175	66.7			.	.			0.999	1.331			45.479	37.77		0.332		1	14550

## Sheet: Sheet2
Independent Samples T-Test
										95% CI for Hedges' g
		t		df		p		Hedges' g		Lower		Upper
CMJD		-1.401		15		0.182	ᵃ	-0.646		-1.615		0.344
SJD		-0.939		15		0.362		-0.433		-1.391		0.539
EURD		-1.331		14		0.204		-0.634		-1.638		0.391
RSID		-0.023		9		0.982		-0.013		-1.199		1.174
SSCD		-1.051		14		0.311		-0.501		-1.497		0.513
Note. Student's t-test.
ᵃ Levene's test is significant (p < .05), suggesting a violation of the equal variance assumption
Independent Samples T-Test
		Levene Test		t-test of the mean equation
		F	Sig.	t	df	Sig.	Mean Difference	Standard error value	95%CIof the difference
									Lower	Upper
CMJD	Assuming equal variances	4.67175	0.04724	-1.40054	15	0.181696	-7.228	5.16085	-18.2281	3.77209
	Assume that the variances are not equal			-1.31673	7.1353	0.228643	-7.228	5.48936	-20.1586	5.70255
SJD	Assuming equal variances	3.52337	0.0800979	-0.939387	15	0.362414	-4.42835	4.71408	-14.4762	5.61948
	Assume that the variances are not equal			-0.884355	7.27136	0.404796	-4.42835	5.00743	-16.18	7.32335
EURD	Assuming equal variances	0.157795	0.697185	-1.33147	14	0.20431	-0.0542381	0.0407356	-0.141607	0.033131
	Assume that the variances are not equal			-1.31696	12.4633	0.211555	-0.0542381	0.0411845	-0.143603	0.0351265
RSID	Assuming equal variances	0.437523	0.524891	-0.0229835	9	0.982165	-0.00245	0.106598	-0.243591	0.238691
	Assume that the variances are not equal			-0.0226554	8.05093	0.982477	-0.00245	0.108142	-0.251552	0.246652
SSCD	Assuming equal variances	1.09017	0.314128	-1.0509	14	0.311108	-3.73965	3.55853	-11.3719	3.89264
	Assume that the variances are not equal			-1.09923	13.9137	0.290324	-3.73965	3.40206	-11.0406	3.56129
Independent Samples T-Test
		Levene Test		t-test of the mean equation
		F	Sig.	t	df	Sig.	Mean Difference	Standard error value	95%CI of the difference
									Lower	Upper
repetitions	Assuming equal variances	0.0143802	0.906382	-0.00964658	13	0.99245	-0.111111	11.5182	-24.9946	24.7724
	Assume that the variances are not equal			-0.0099409	11.9212	0.992233	-0.111111	11.1772	-24.4819	24.2597
Load	Assuming equal variances	0.344909	0.56707	-0.752334	13	0.465255	-728.889	968.836	-2821.93	1364.15
	Assume that the variances are not equal			-0.725891	9.55127	0.485312	-728.889	1004.13	-2980.56	1522.78
